# Supplementary material for: The Synthetic Cannabinoid ADB-FUBINACA Disrupts Mitochondrial Morphology and Dynamics during Neuronal Differentiation of NG108-15 Cells
Source: Springer Nature journal article supplement (doi:10.1007/s12035-026-05699-x), 2026-01-01

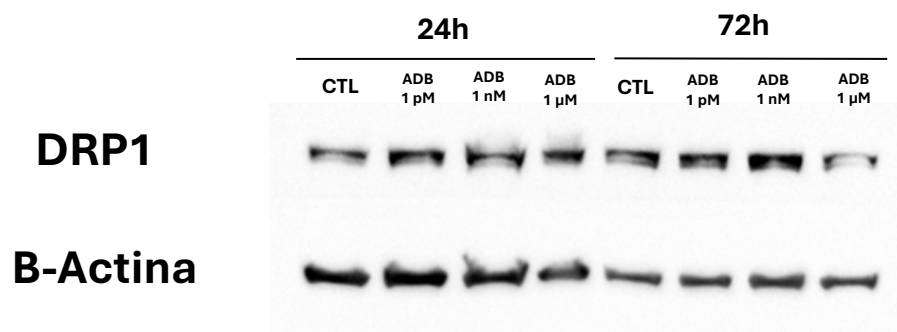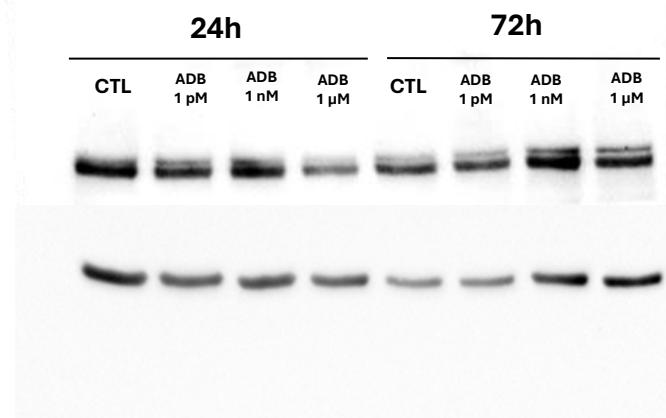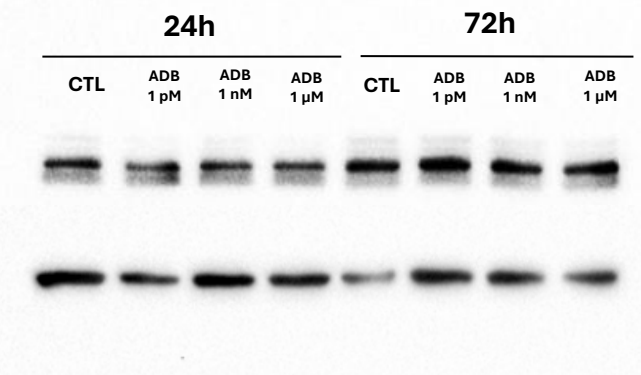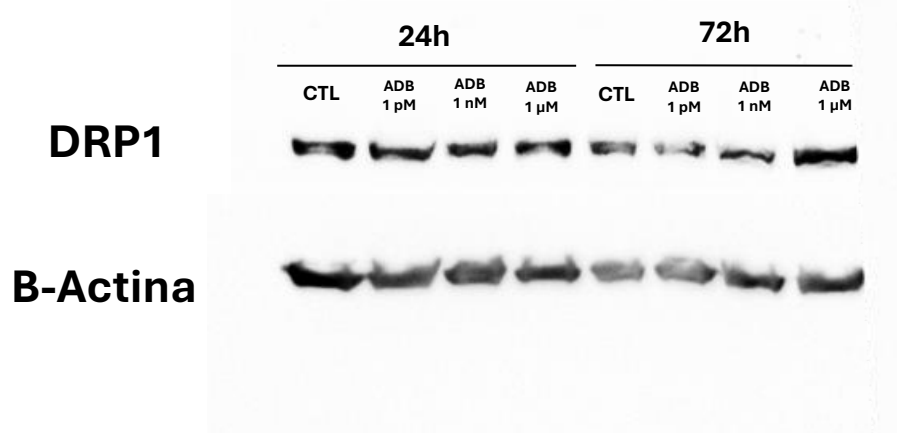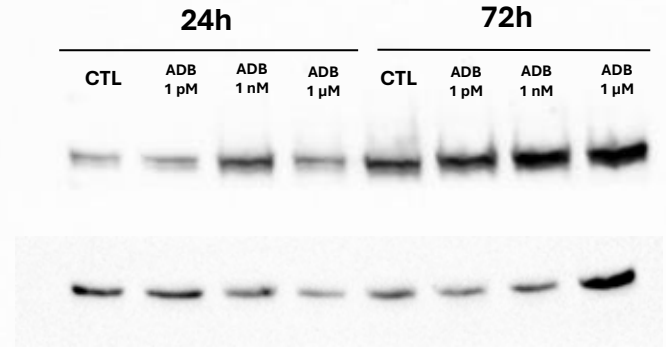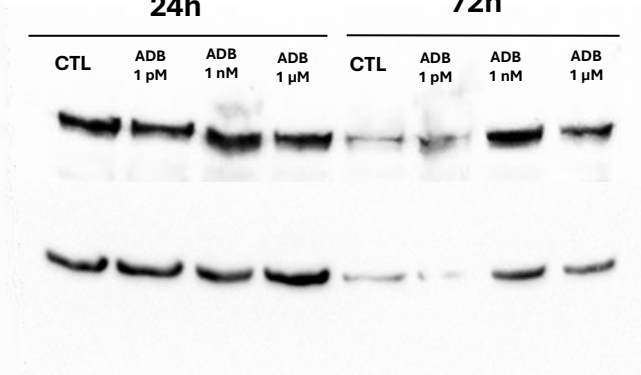

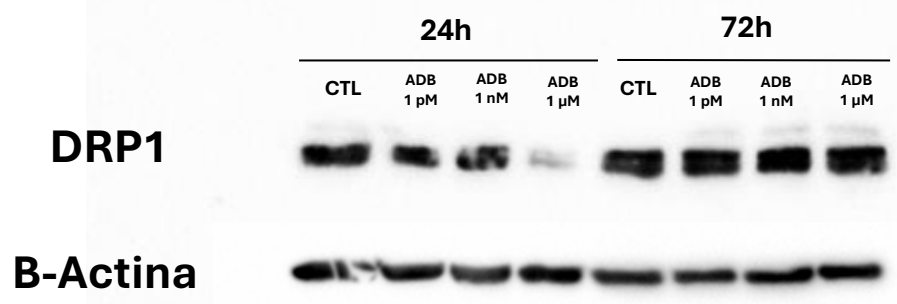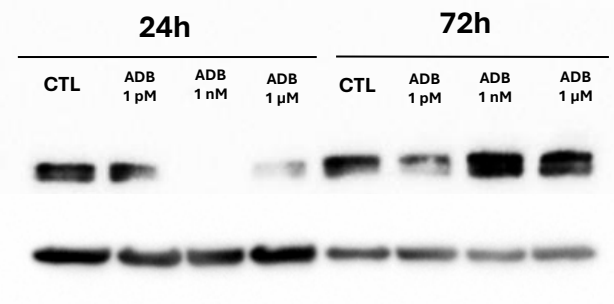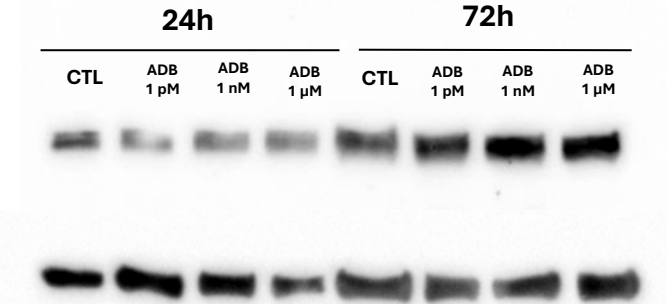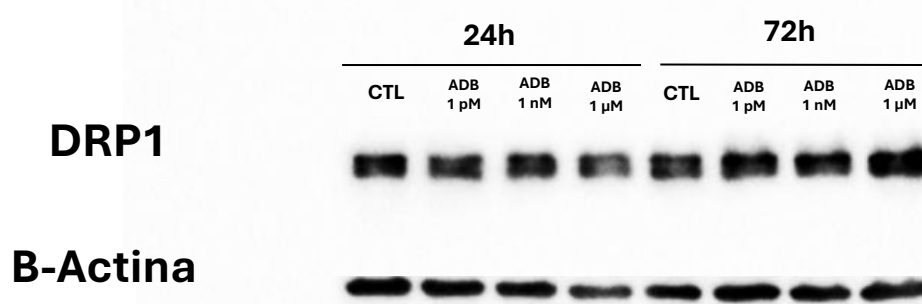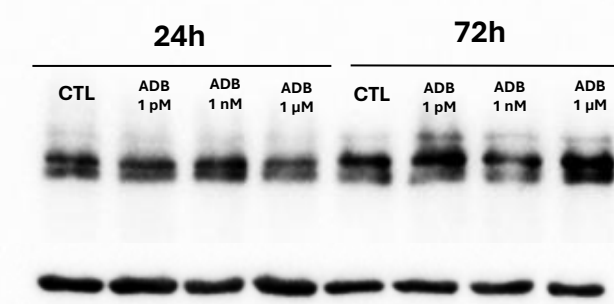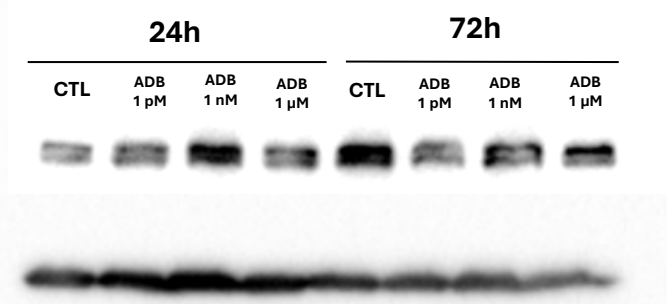

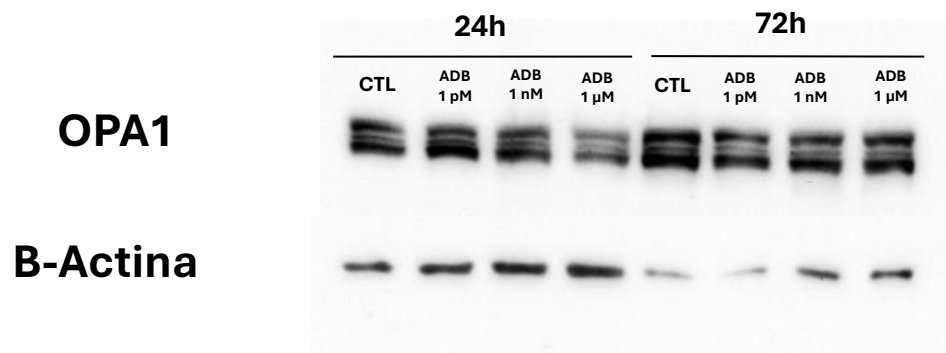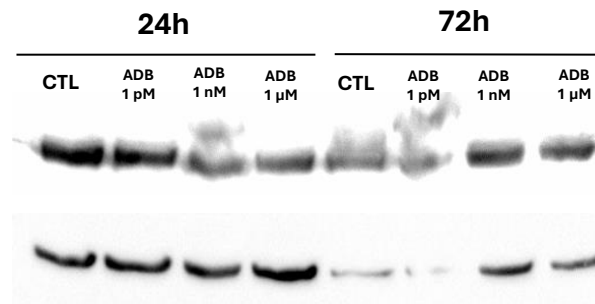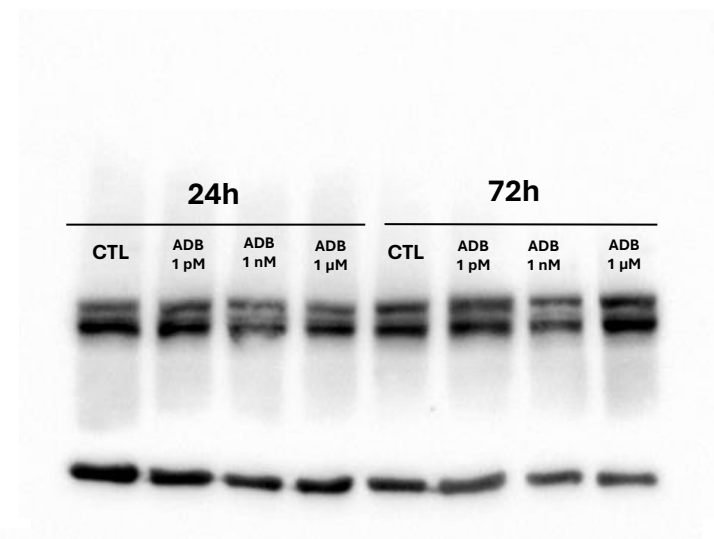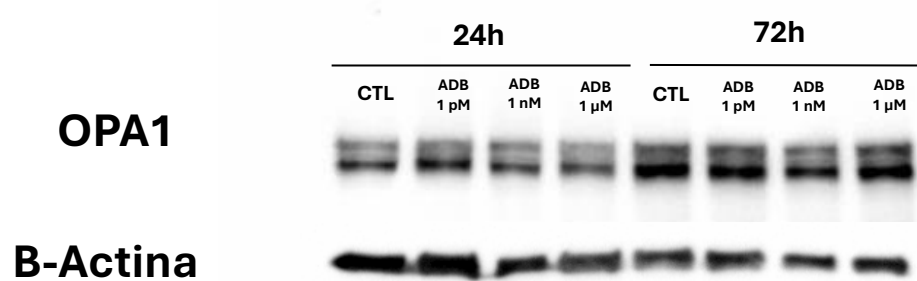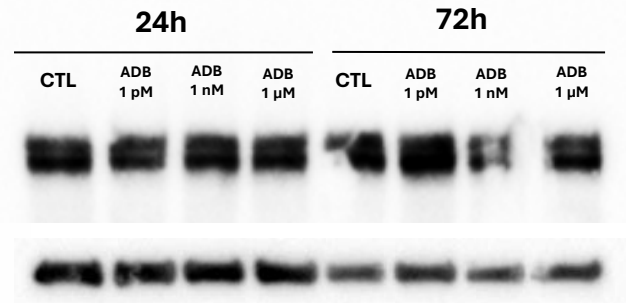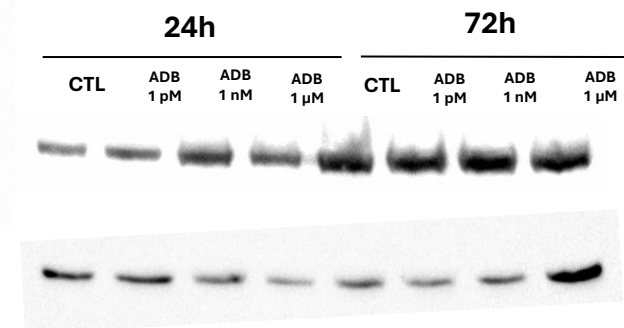

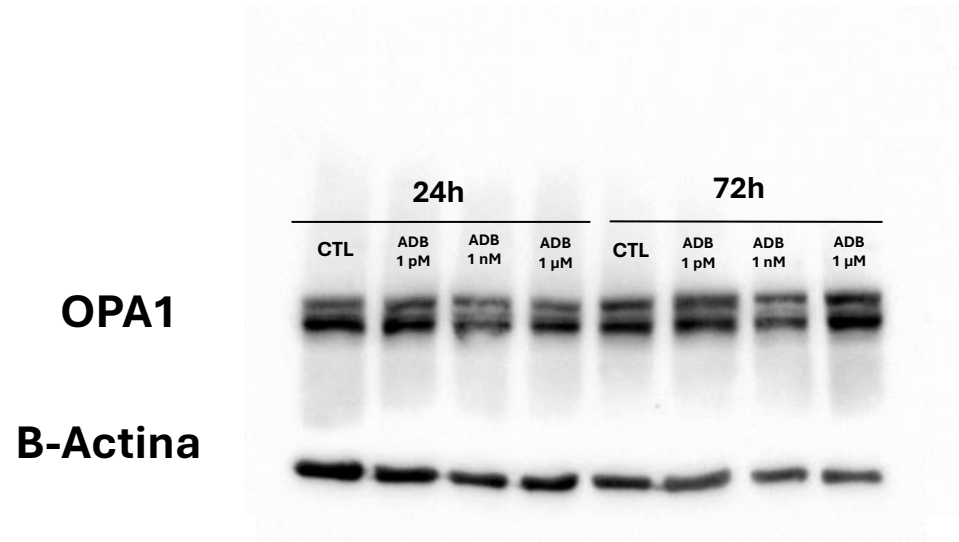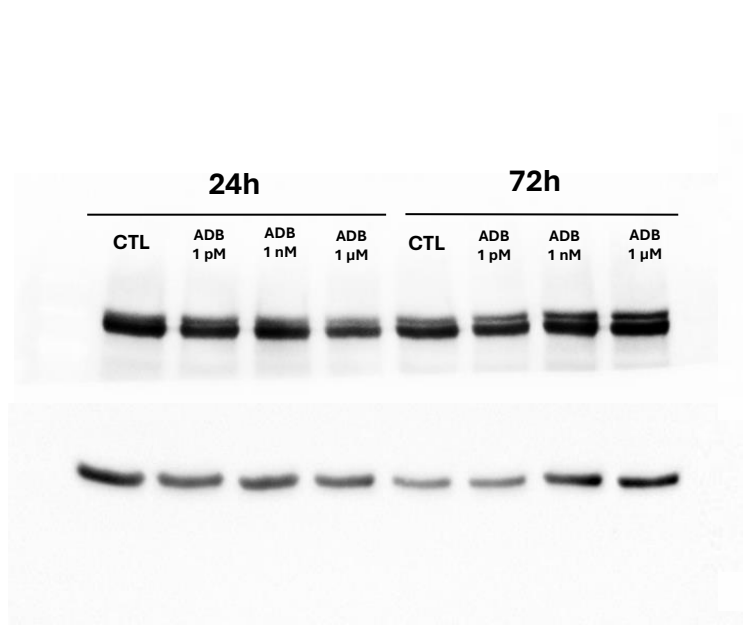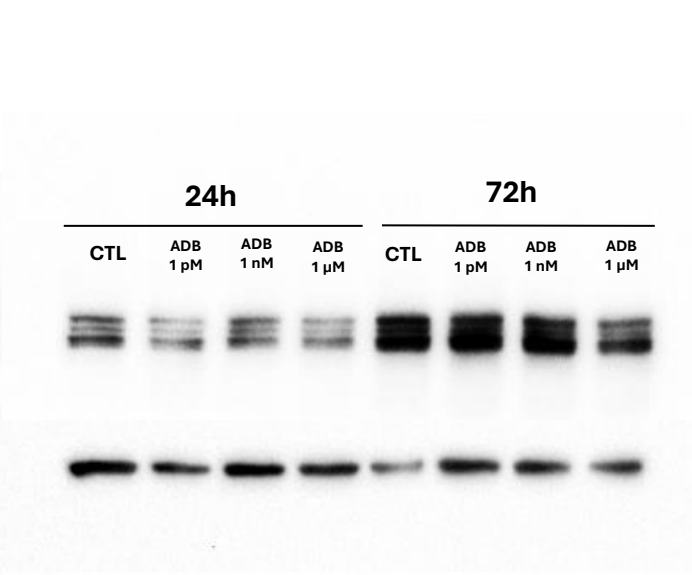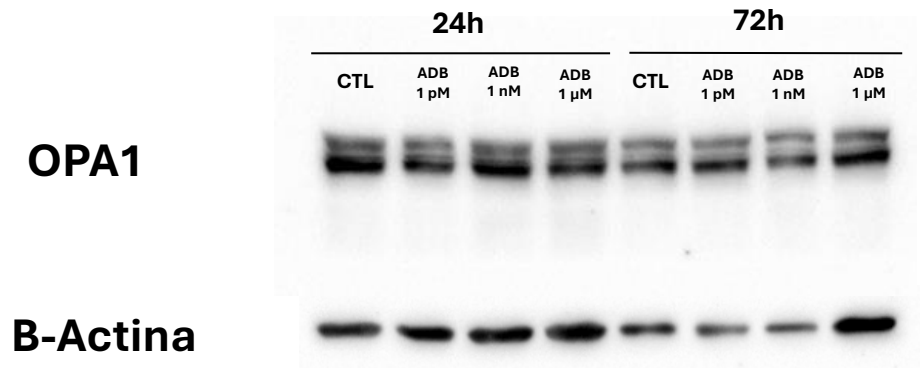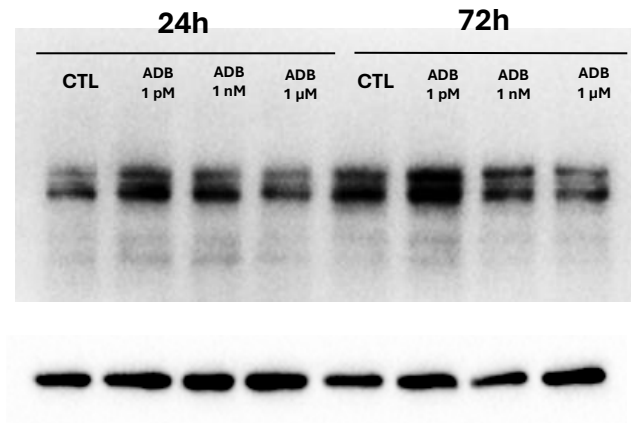

**OPA1**

**B-Actina**

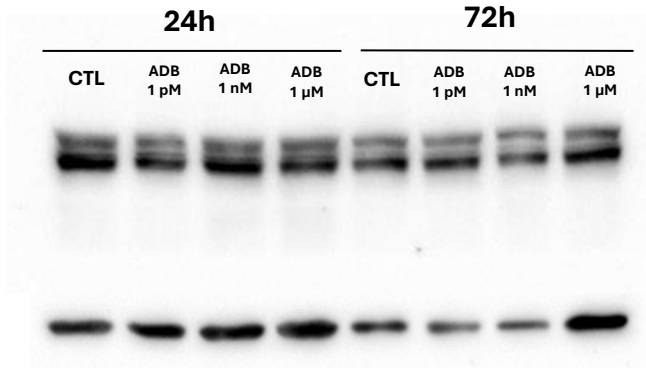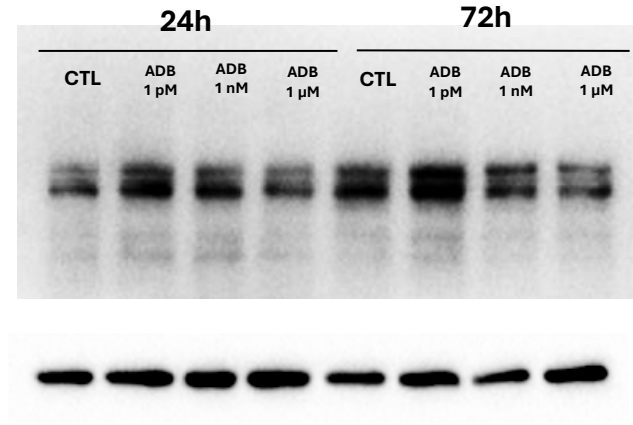



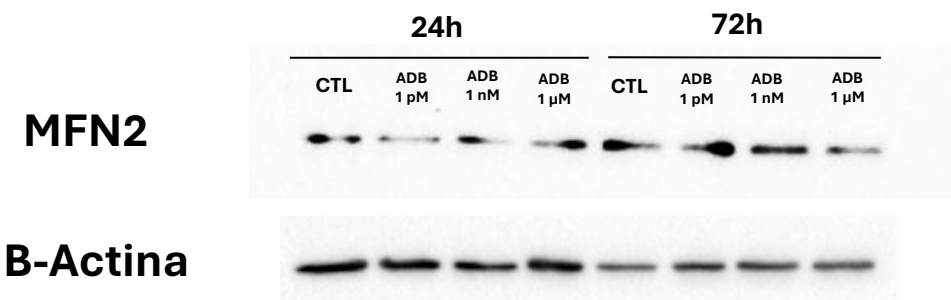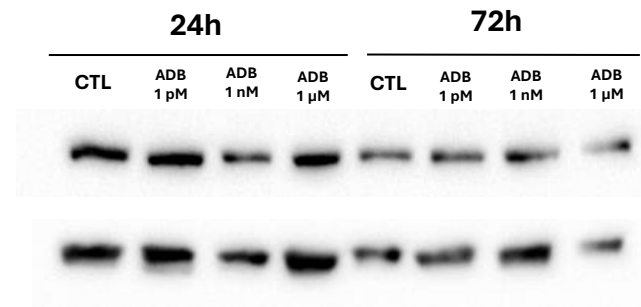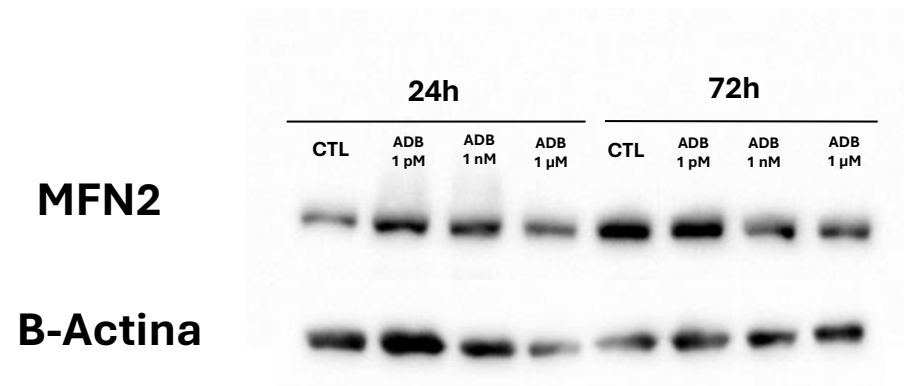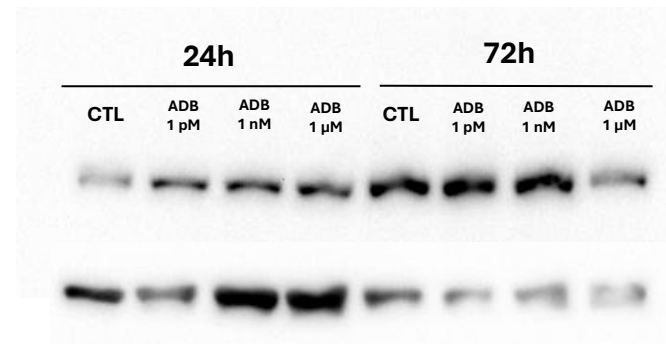

**MFN1**

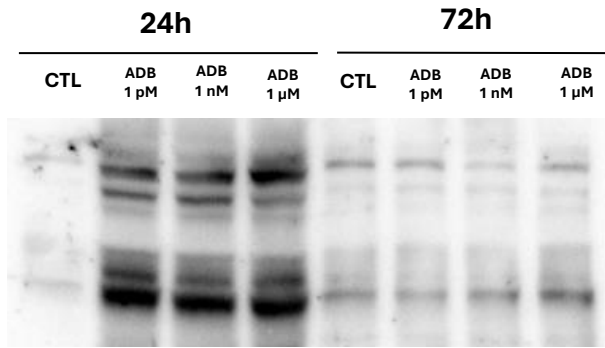

**B-Actina**

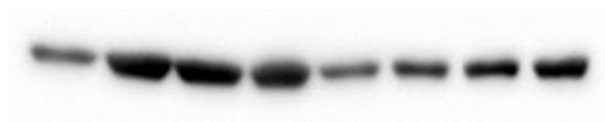

**24h**

**72h**

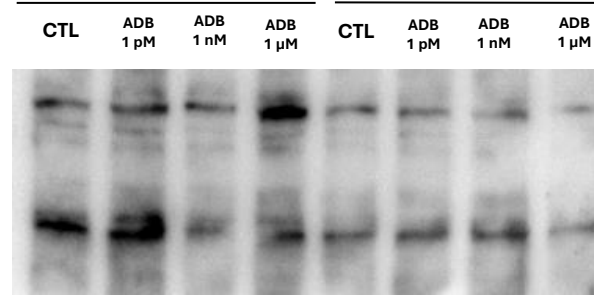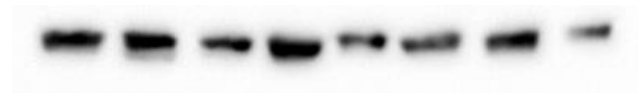

**24h**

**72h**

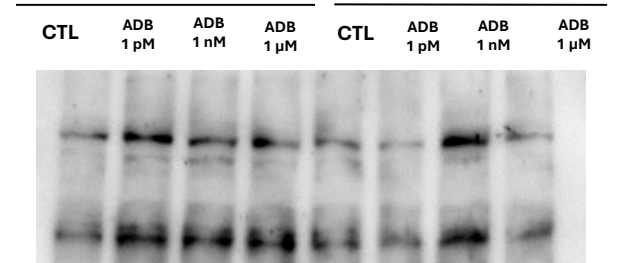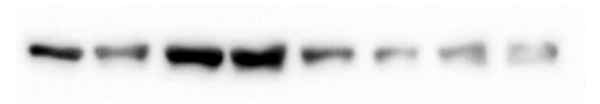

**MFN1**

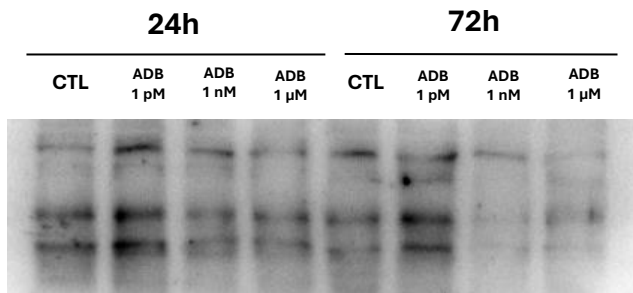

**B-Actina**

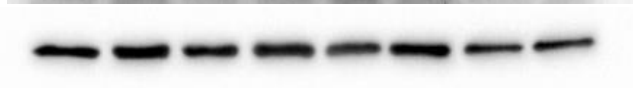

**24h**

**72h**

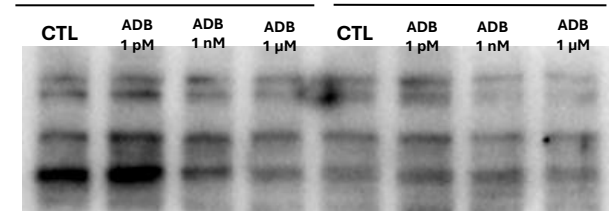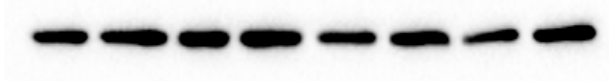

**24h**

**72h**

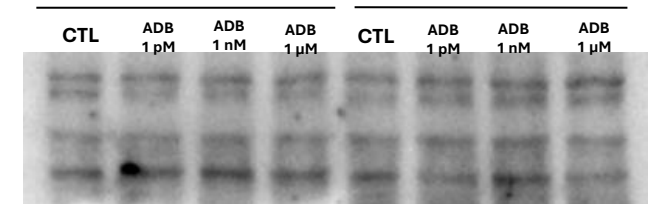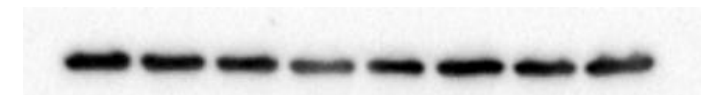

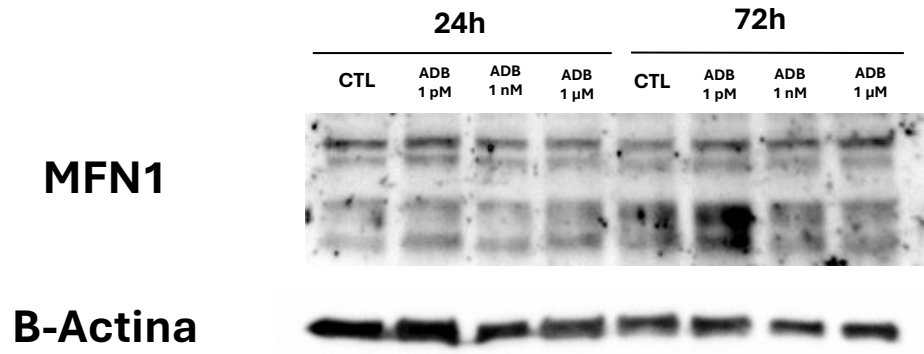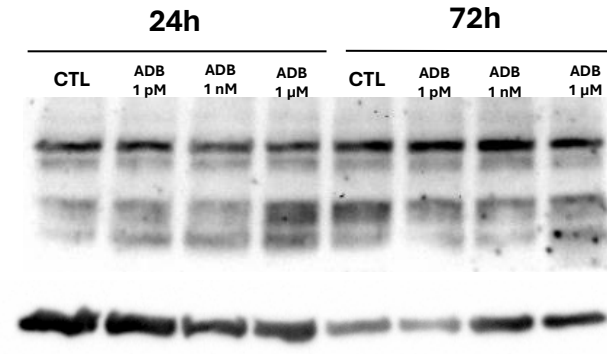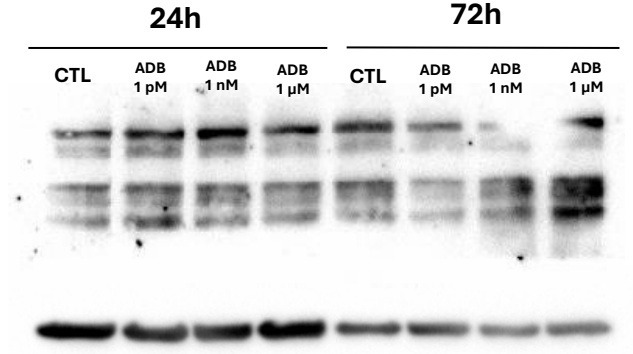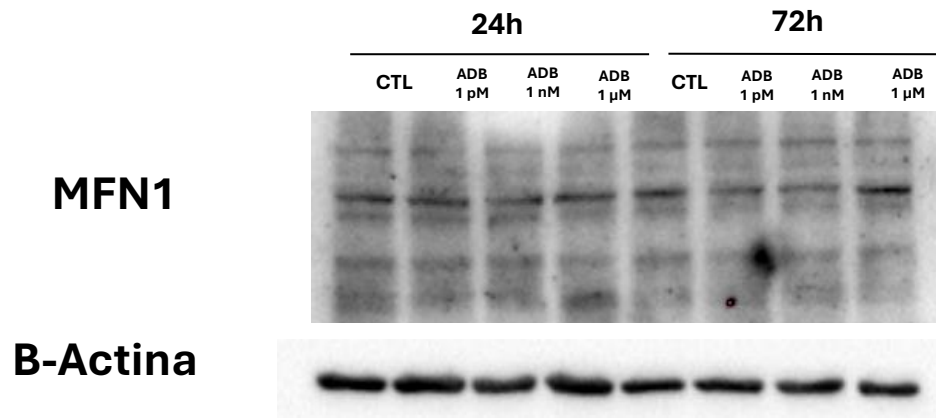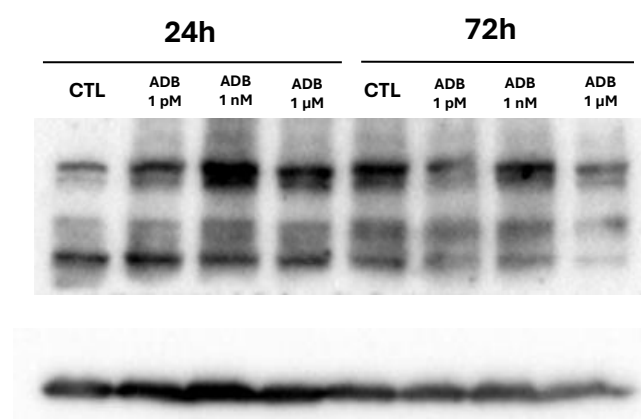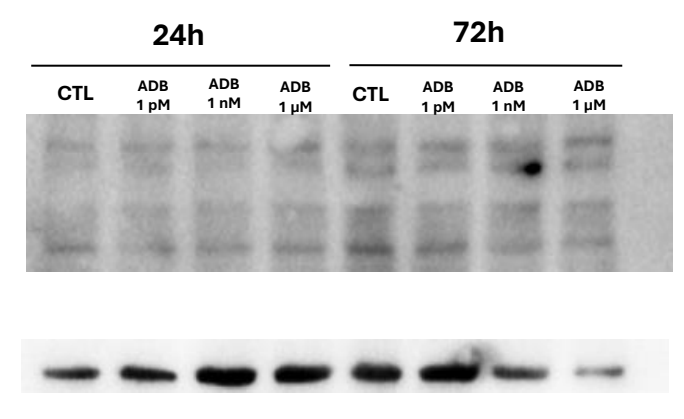

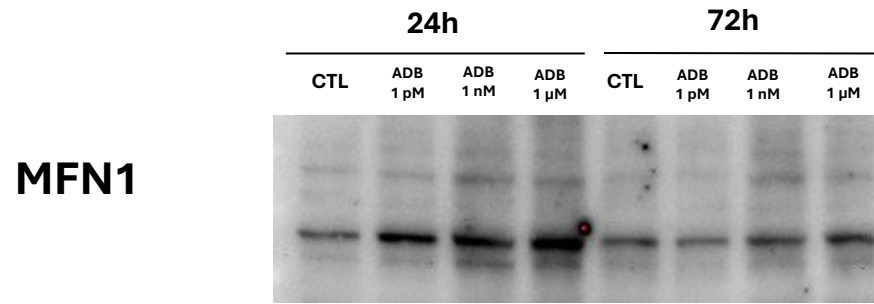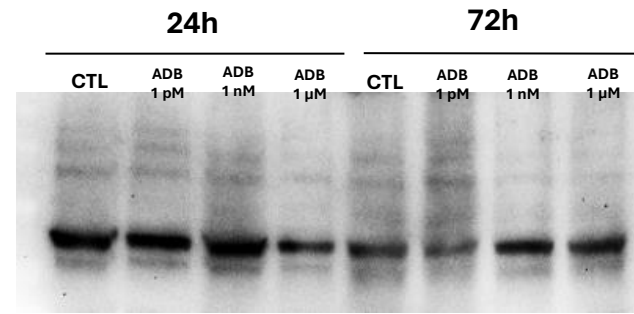

**B-Actina**

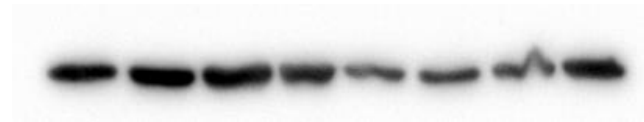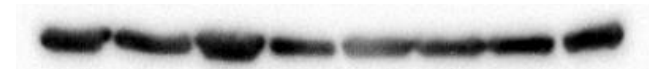

**MFN1**

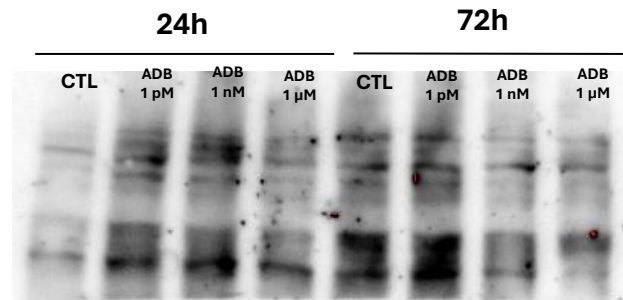

**B-Actina**

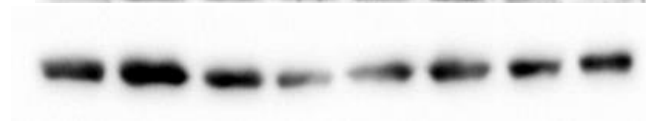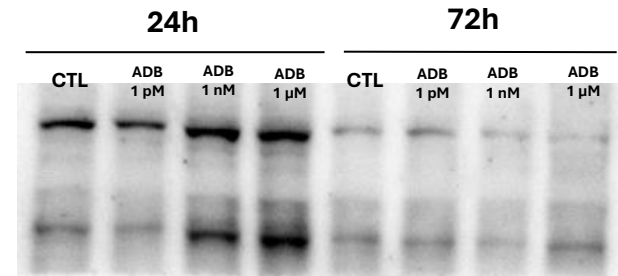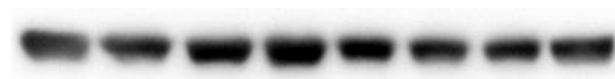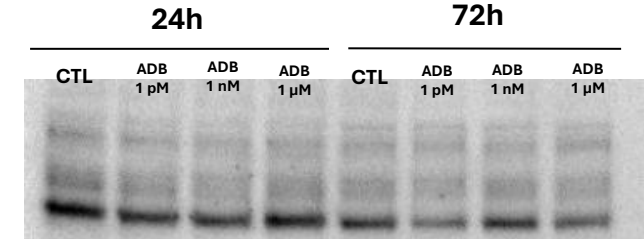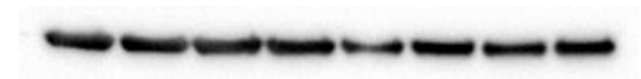

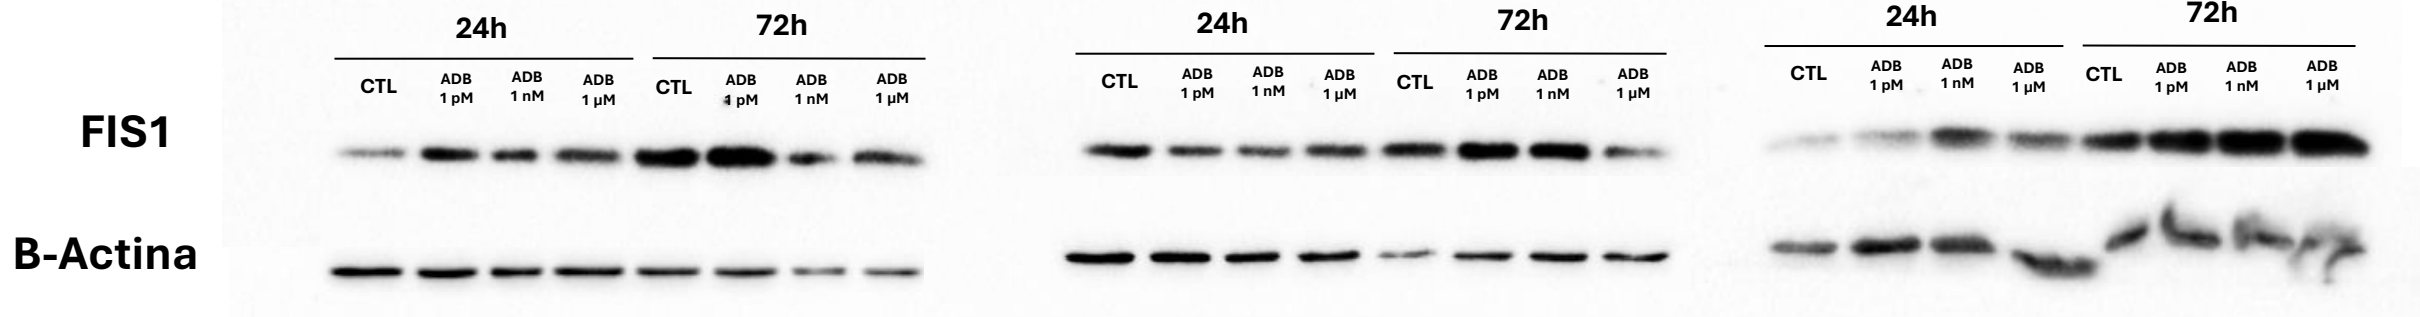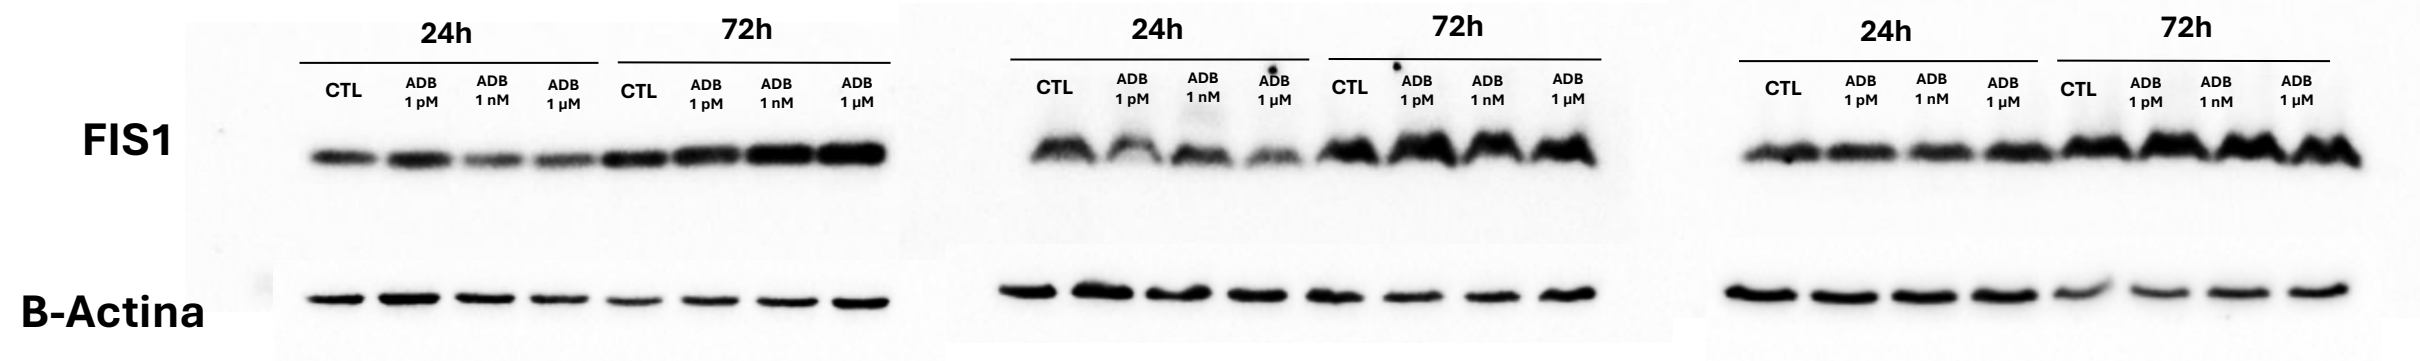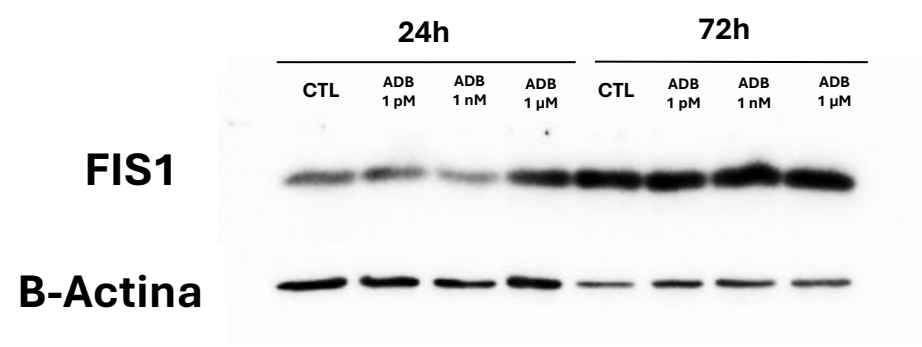

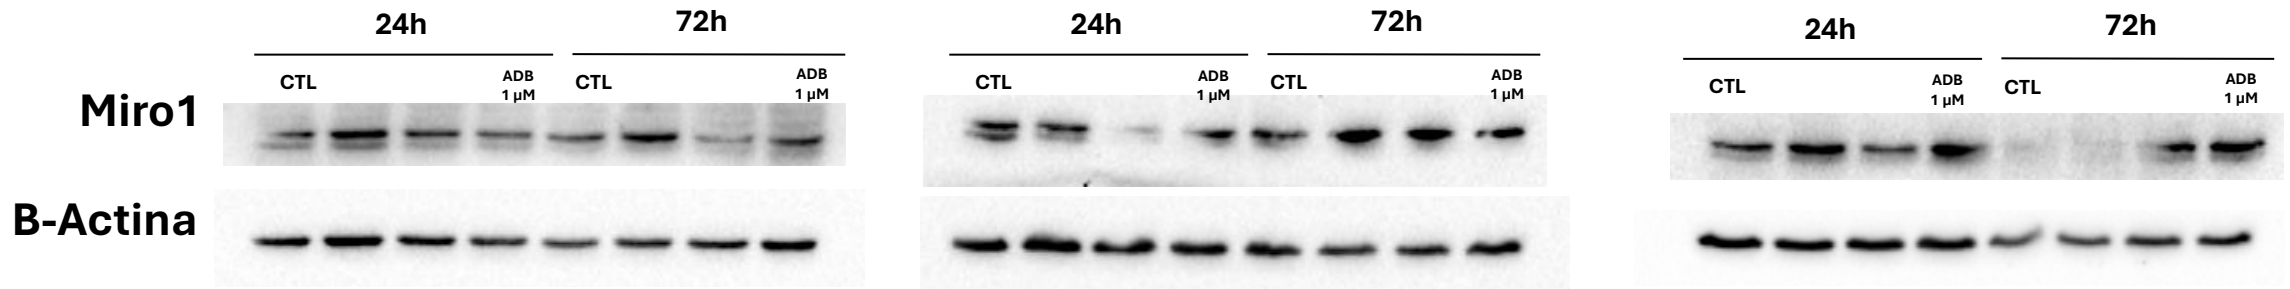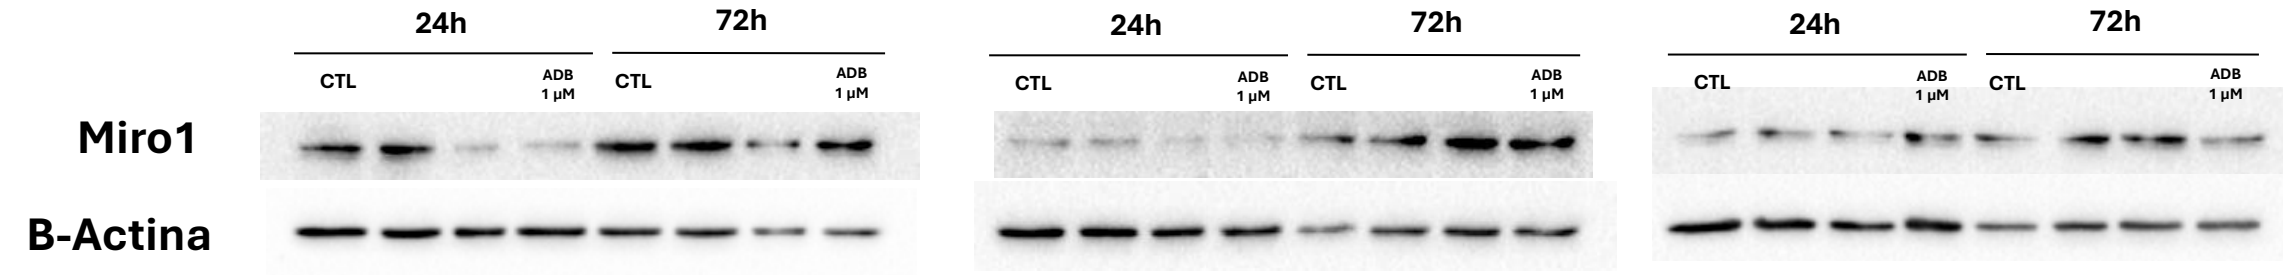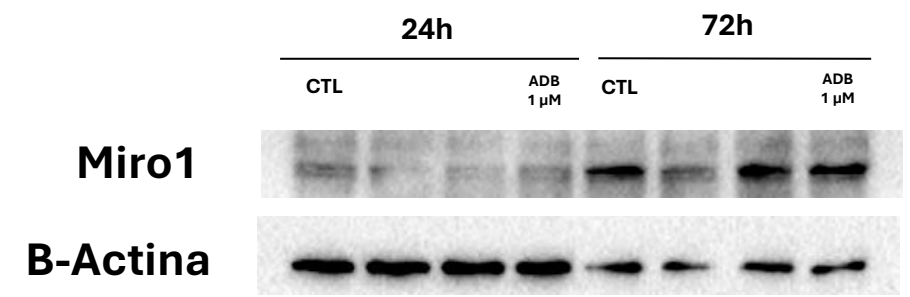



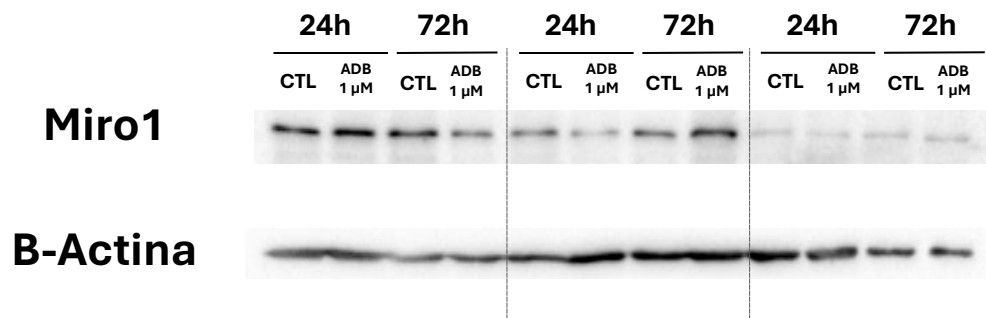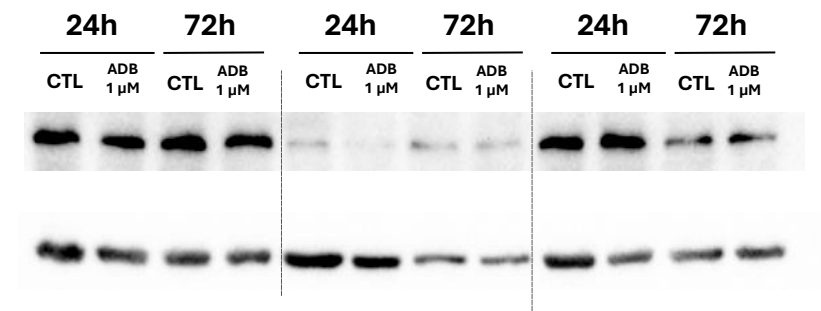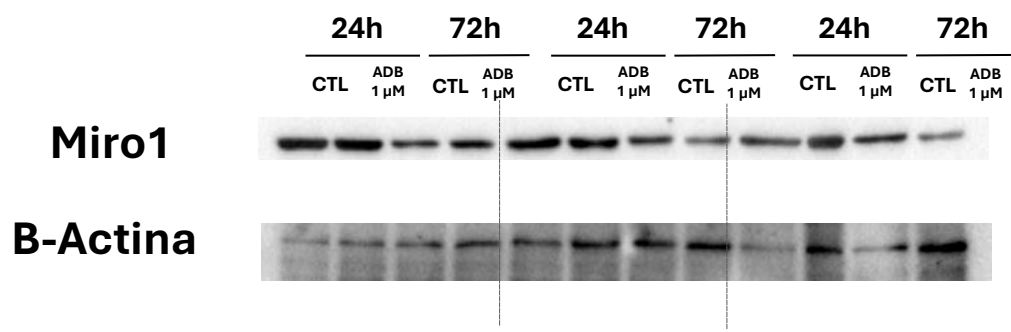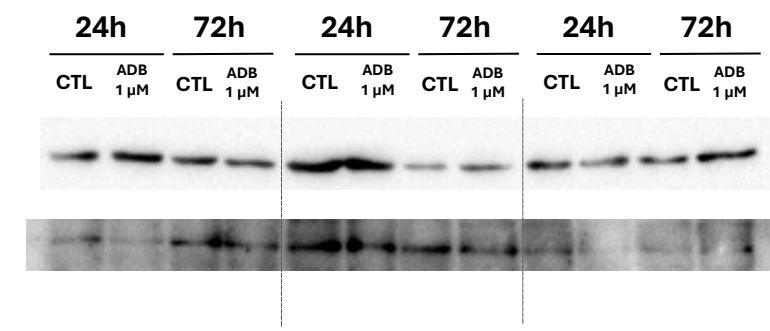

**DRP1**  
**B-Actina**

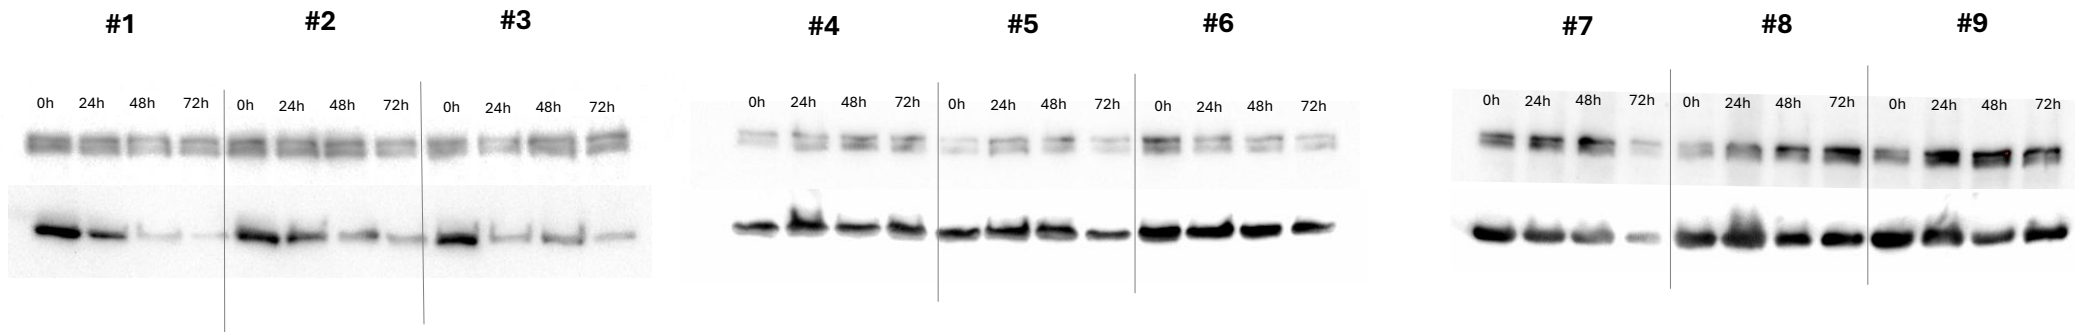

**DRP1**  
**B-Actina**

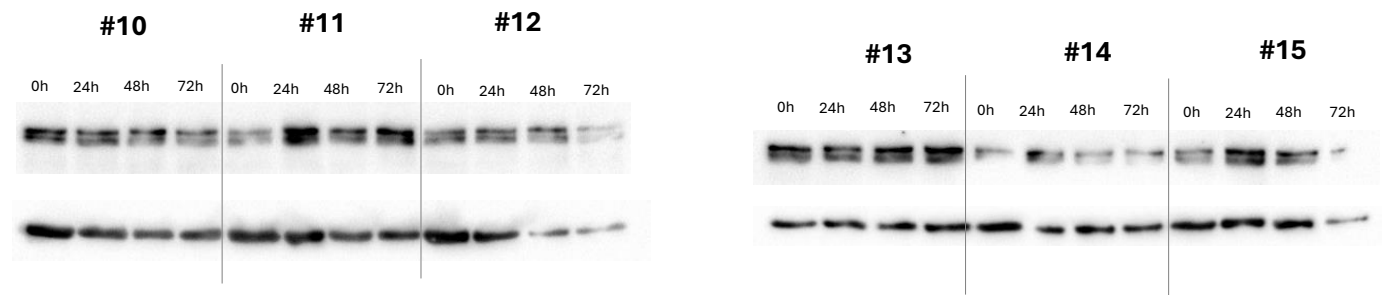

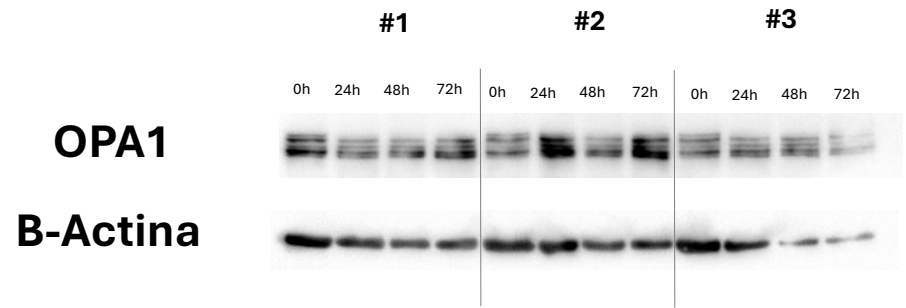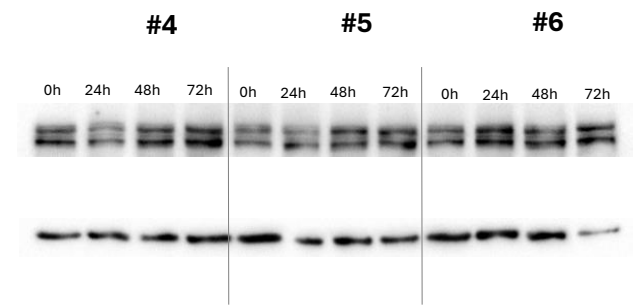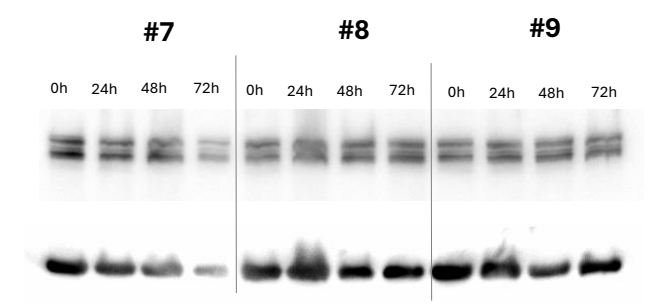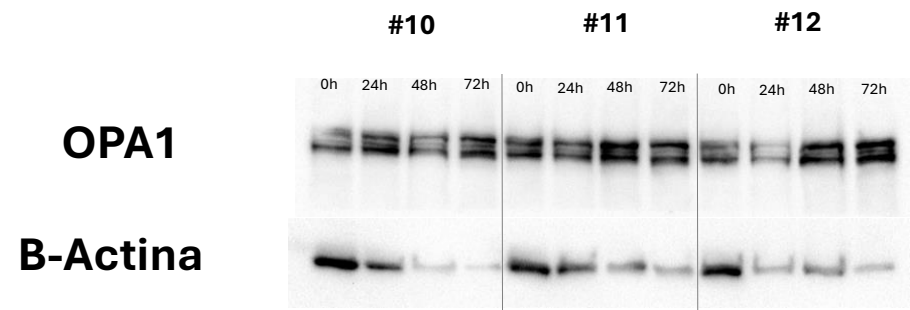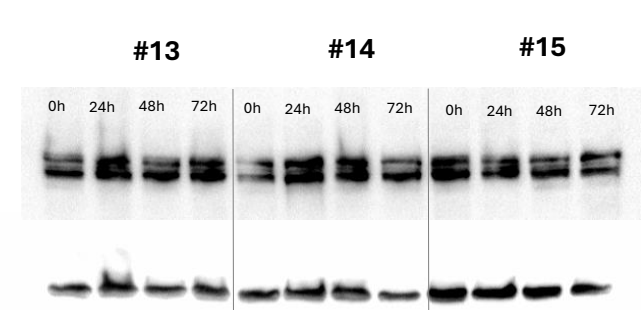

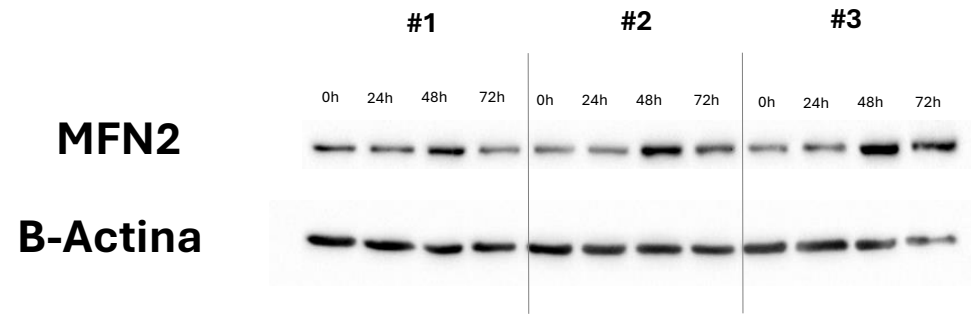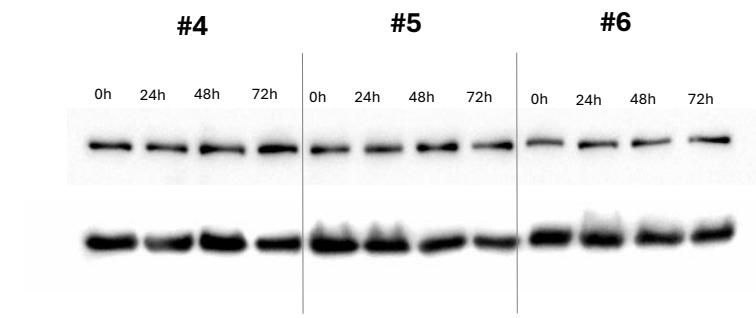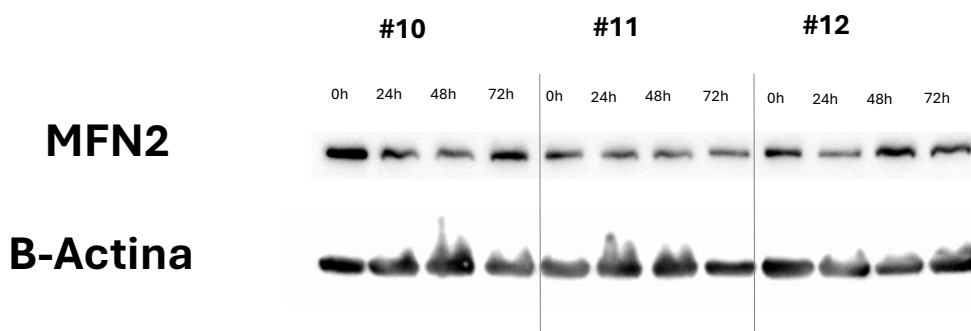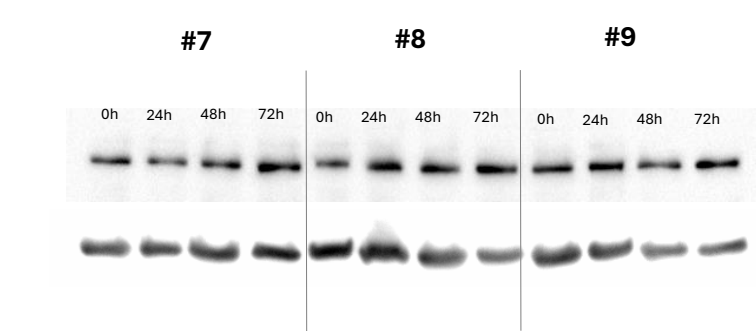

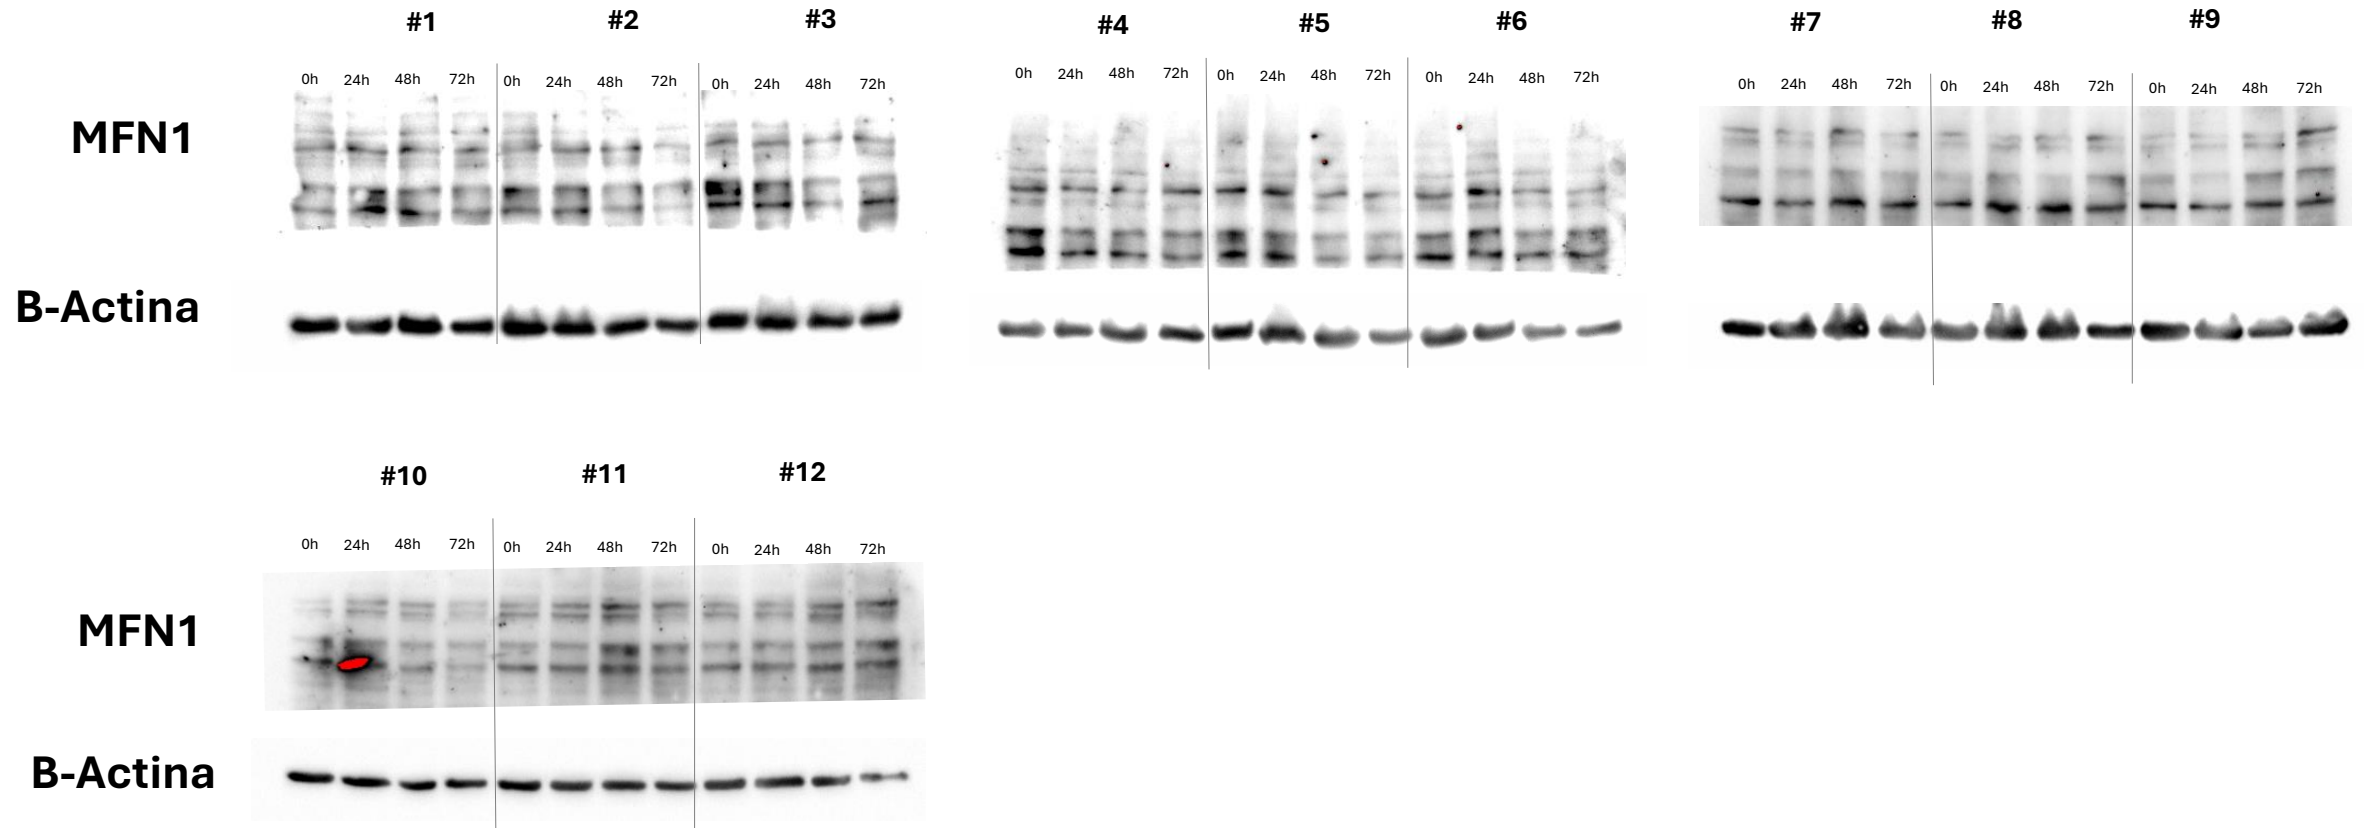

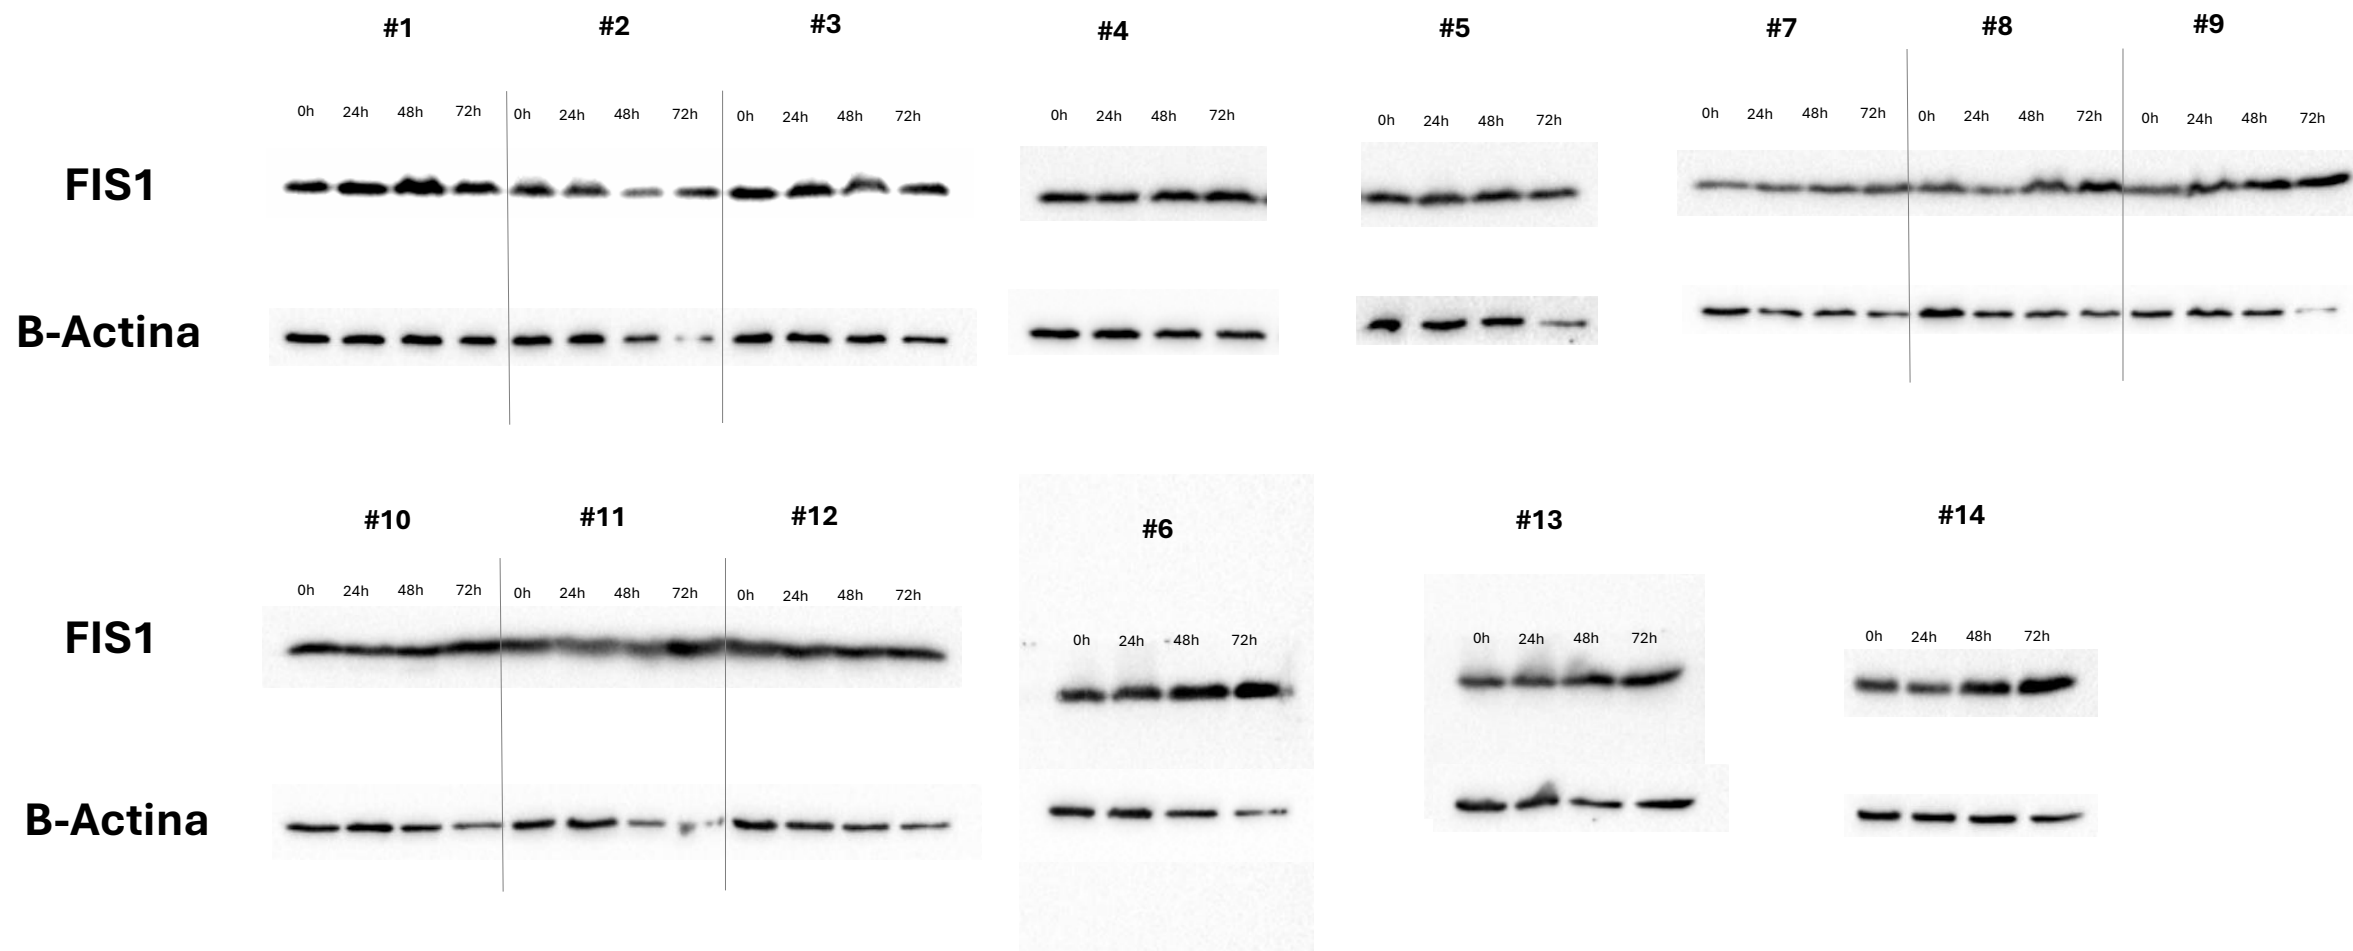

**Miro1**  
**B-Actina**

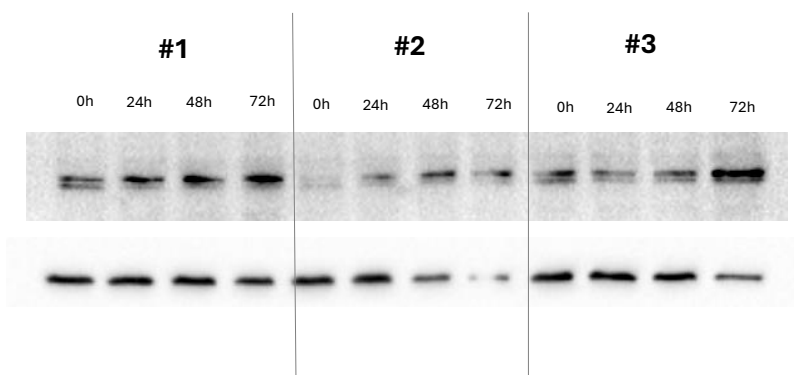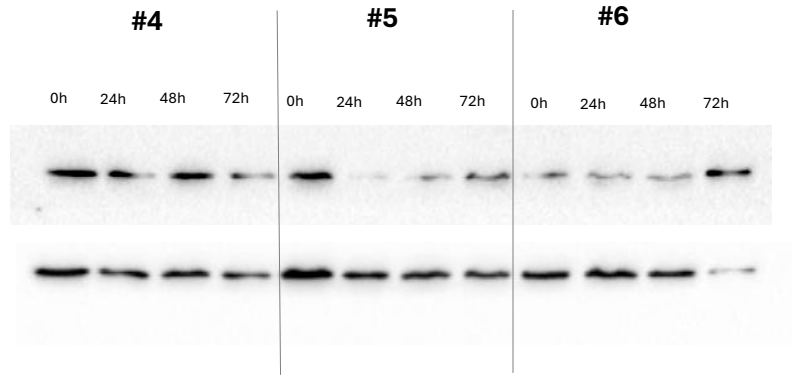

**Miro1**  
**B-Actina**

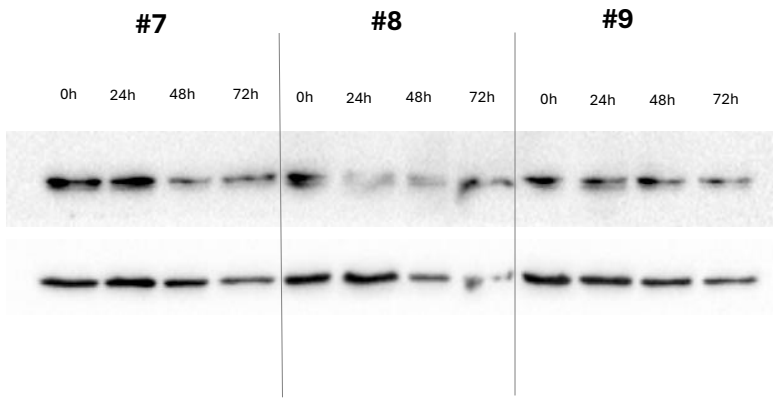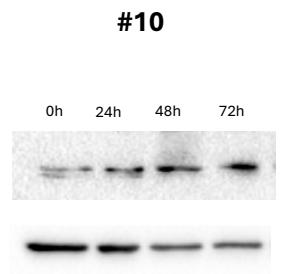

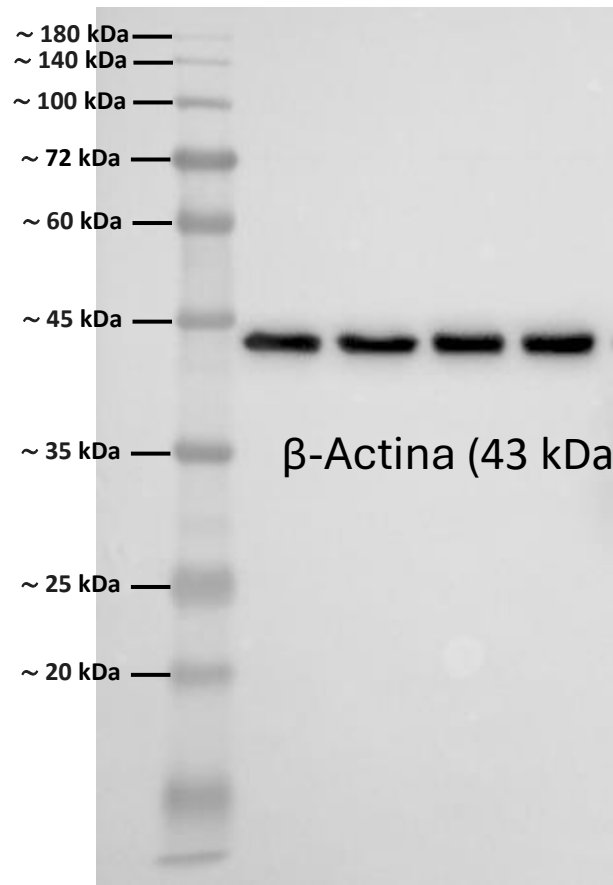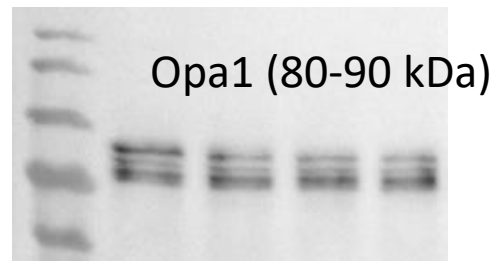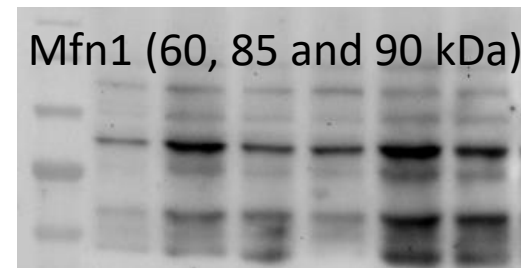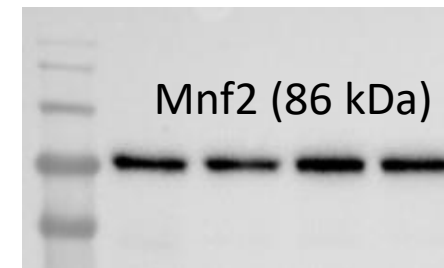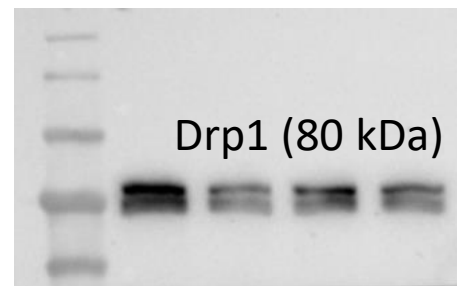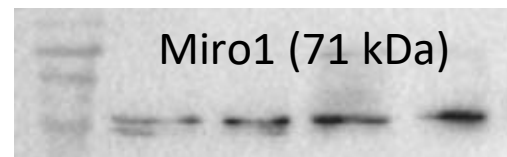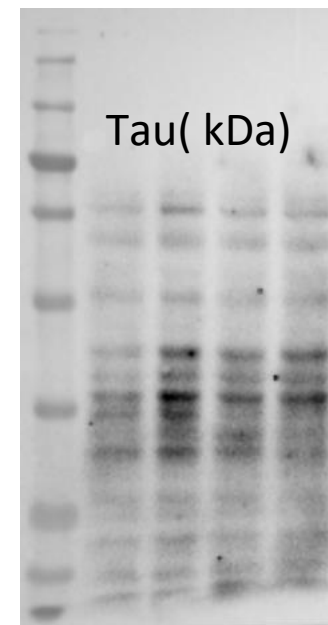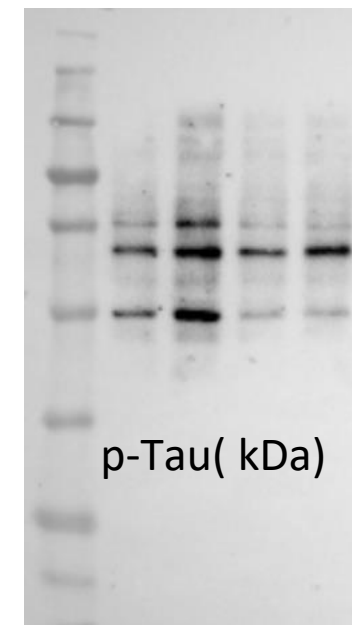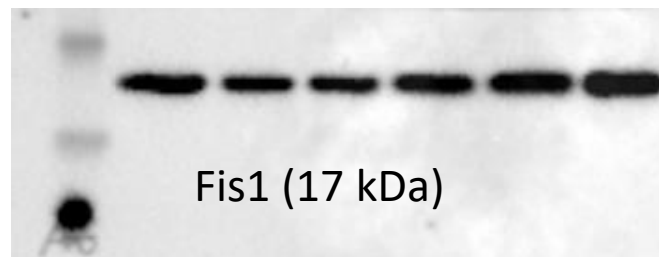

Supplement: MOESM2 [file 12035_2026_5699_MOESM2_ESM.pdf]
